# Supplementary material for: Systematic misperceptions of 3-D motion explained by Bayesian inference
Source: PubMed Central journal article supplement — J Vis. 2018 Mar 29;18(3):23. doi: 10.1167/18.3.23 (PMC6691918; doi:10.1167/18.3.23), 2018-03-29
Supplement: jovi-18-02-17_s03.pdf [file jovi-18-02-17_s03.pdf]

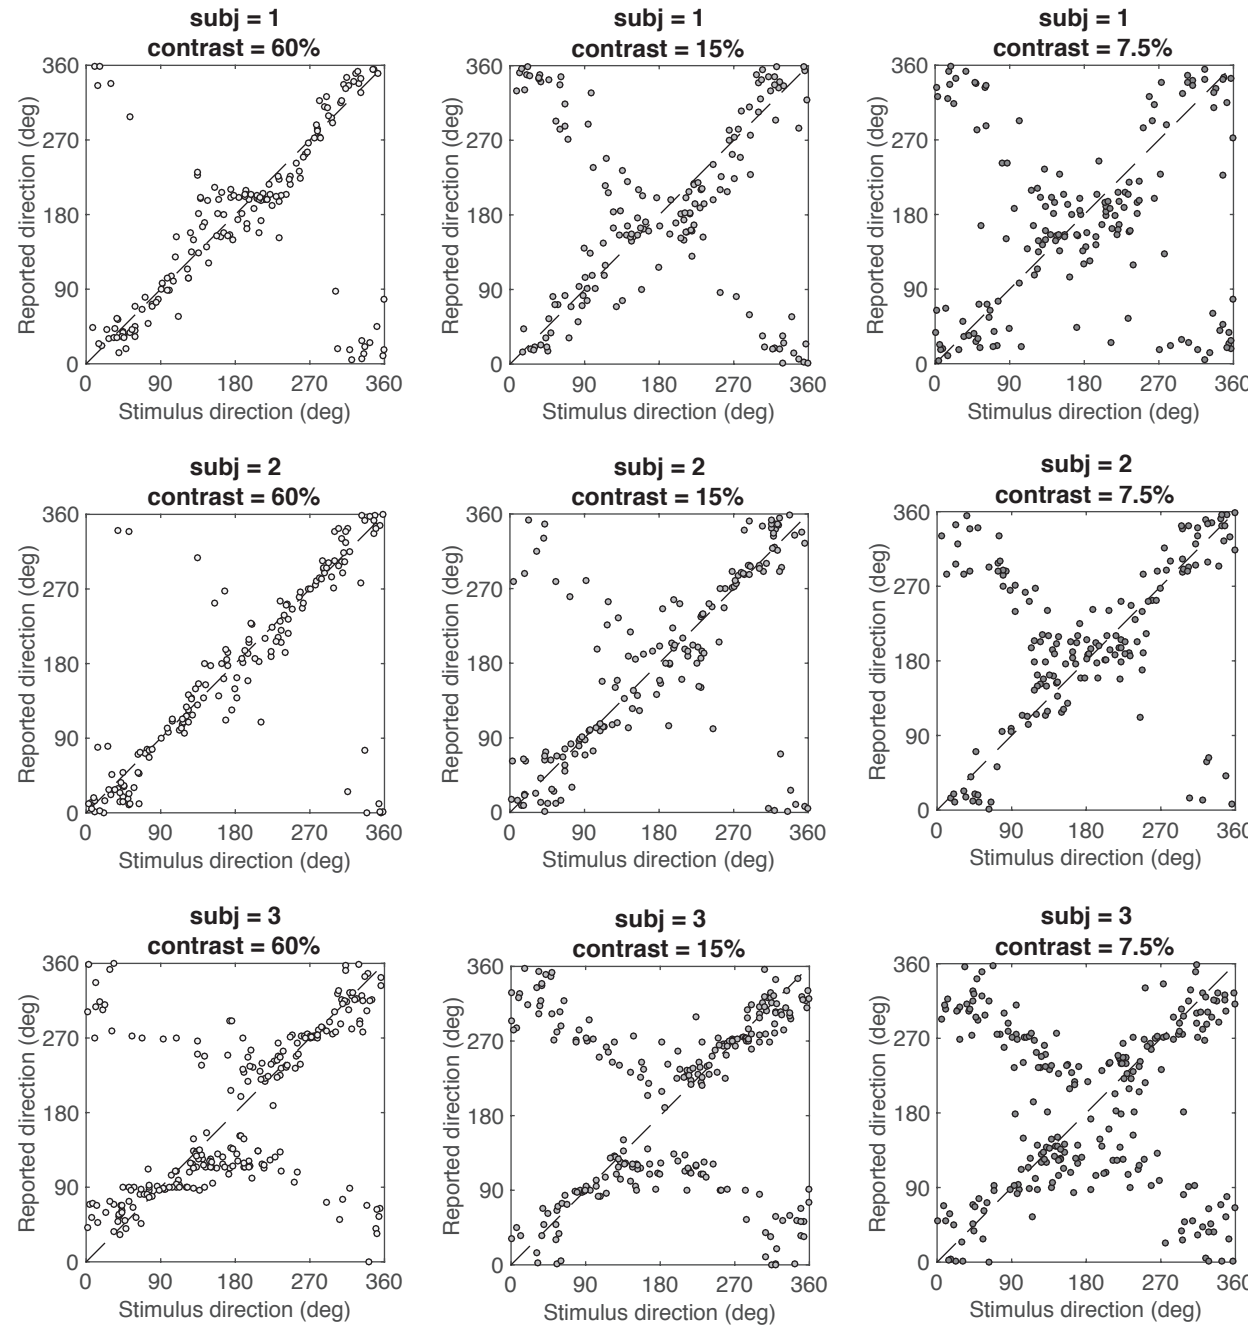

**Figure S2.** Raw data from Experiment 2. Data are shown in the same format as Figure S1, except each individual participant's responses are shown separately
