# Supplementary material for: Systematic misperceptions of 3-D motion explained by Bayesian inference
Source: PubMed Central journal article supplement — J Vis. 2018 Mar 29;18(3):23. doi: 10.1167/18.3.23 (PMC6691918; doi:10.1167/18.3.23), 2018-03-29
Supplement: jovi-18-02-17_s04.pdf [file jovi-18-02-17_s04.pdf]

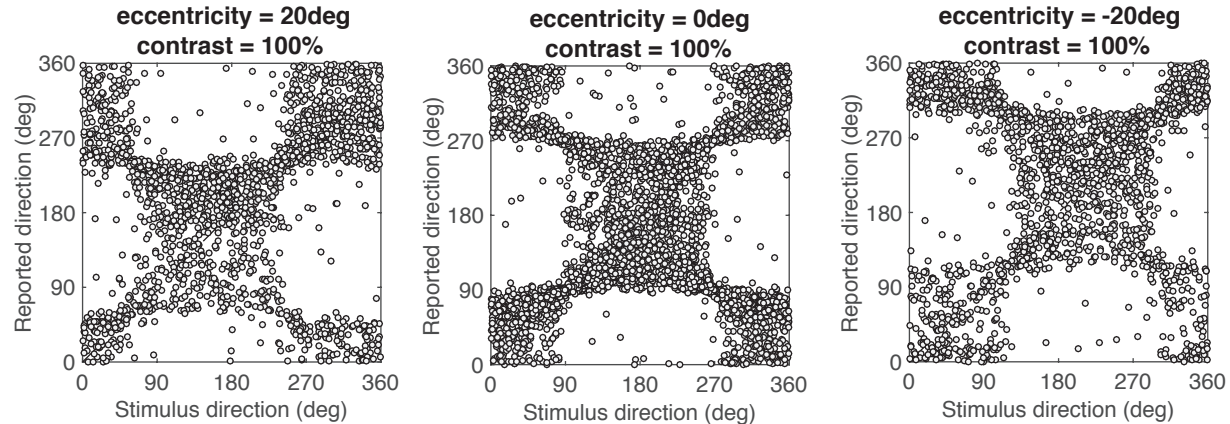

**Figure S3.** Raw data from Experiment 3. Data are shown in the same format as Figure S1. Note that only one stimulus contrast (100%) and viewing distance (90cm) was used in this experiment.
